# Supplementary material for: Investigation of piezoelectric property and nanodomain structures for PIN–PZ–PMN–PT single crystals as a function of crystallographic orientation and temperature
Source: Royal Society of Chemistry journal article supplement (doi:10.1039/c7tc00001d), 2017-01-01
Supplement: c7tc00001d1.pdf [file c7tc00001d1.pdf]

## Electronic supplementary information (ESI)

### Investigation of piezoelectric property and nanodomain structures for PIN-PZ-PMN-PT single crystals as a function of crystallographic orientation and temperature

Wenhui He,<sup>a</sup> Qiang Li,<sup>a</sup> Yue Sun,<sup>a</sup> Xiaoqing Xi,<sup>b</sup> Yiling Zhang<sup>b</sup> and Qingfeng Yan<sup>\*a</sup>

<sup>a</sup>Department of Chemistry, Tsinghua University, Beijing 100084, China. E-mail: yanqf@mail.tsinghua.edu.cn. Tel: +86-10-62792830, Fax: +86-10 62771149

<sup>b</sup>State Key Laboratory of New Ceramics and Fine Processing, Tsinghua University, Beijing 100084, China

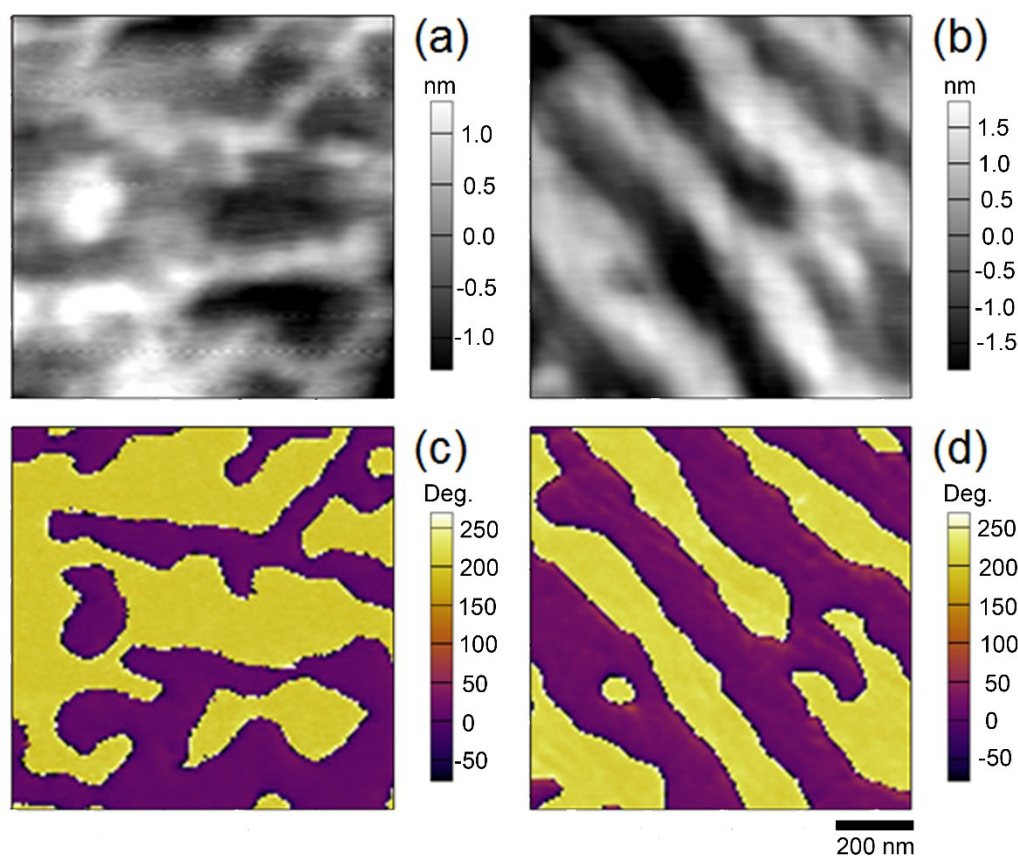

**Fig. S1** Surface topography and corresponding PFM phase images of (a, c) [001]<sub>C</sub> and (b, d) [011]<sub>C</sub> PIN-PZ-PMN-PT single crystals.

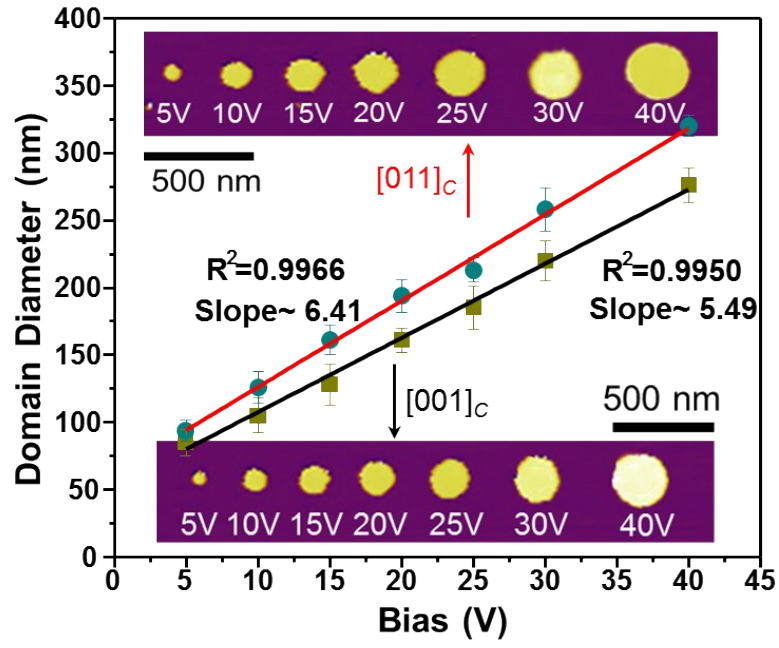

**Fig. S2** Domain diameter of  $[001]_c$  and  $[011]_c$  PIN-PZ-PMN-PT single crystal as a function of DC bias voltage for 1s durations, using an EFM probe with 100 nN loading force. Insets show the corresponding PFM phase images.
